# Supplementary material
Source: publisher figshare collection journal article supplement (https://osapublishing.figshare.com/ndownloader/files/27807231)
Supplement: Supplementary file 1 [file 27807231]

## Interference-based wide-range dynamic tuning of the plasmonic color of single gold nanoparticles: supplement

**BOKUSUI NAKAYAMA,\* TAKAHITO NAKABAYASHI, KEIKO ESASHIKA, YUKI HIRUTA, AND TOSHIHARU SAIKI**

*Graduate School of Science and Technology, Keio University, 3-14-1, Hiyoshi, Kohoku-ku, Yokohama, Kanagawa 223-8522, Japan*

*\*[bokusui.nakayama@saiki.elec.keio.ac.jp](mailto:bokusui.nakayama@saiki.elec.keio.ac.jp)*

---

This supplement published with The Optical Society on 29 April 2021 by The Authors under the terms of the [Creative Commons Attribution 4.0 License](#) in the format provided by the authors and unedited. Further distribution of this work must maintain attribution to the author(s) and the published article's title, journal citation, and DOI.

Supplement DOI: <https://doi.org/10.6084/m9.figshare.14501979>

Parent Article DOI: <https://doi.org/10.1364/OE.422564>

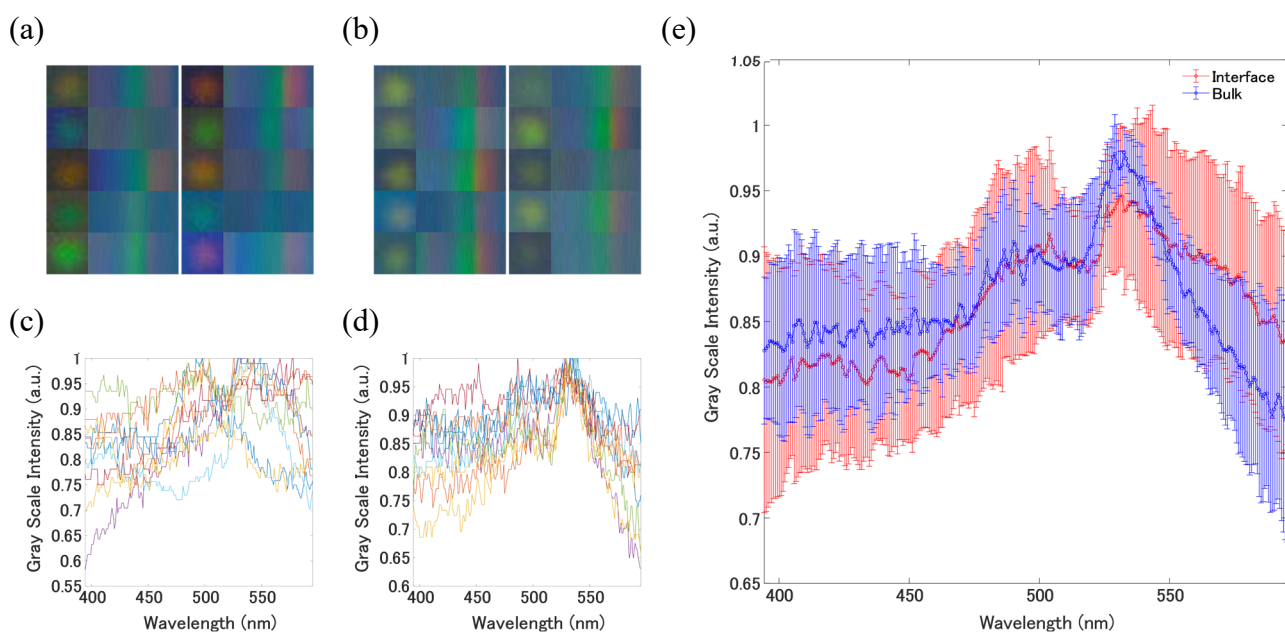

Fig. S1. (a, b) Images of the reflected light for several AuNPs ( $N = 10$ ) with no diffraction (left) and after diffraction (right) (a) in the vicinity of interface and (b) in the bulk. (c, d) Gray scale spectra (c) in the vicinity of interface and (d) in the bulk. (e) Mean and standard deviation of spectral intensity calculated from (c) and (d).

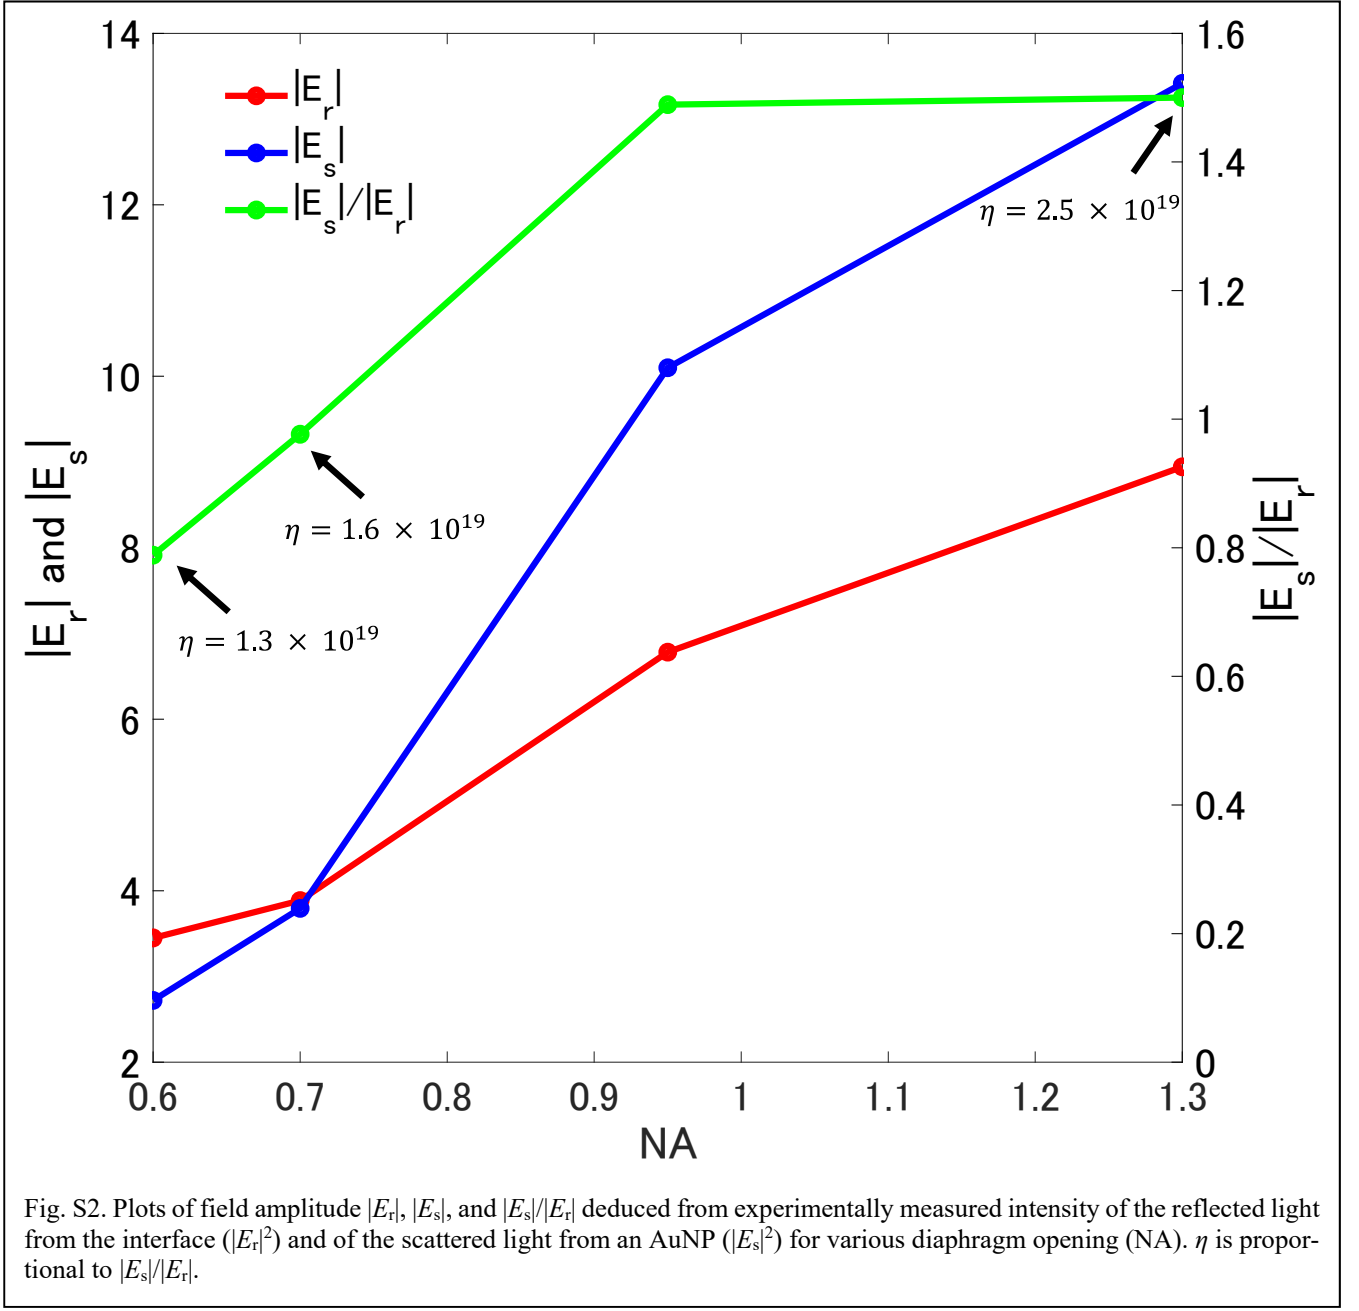

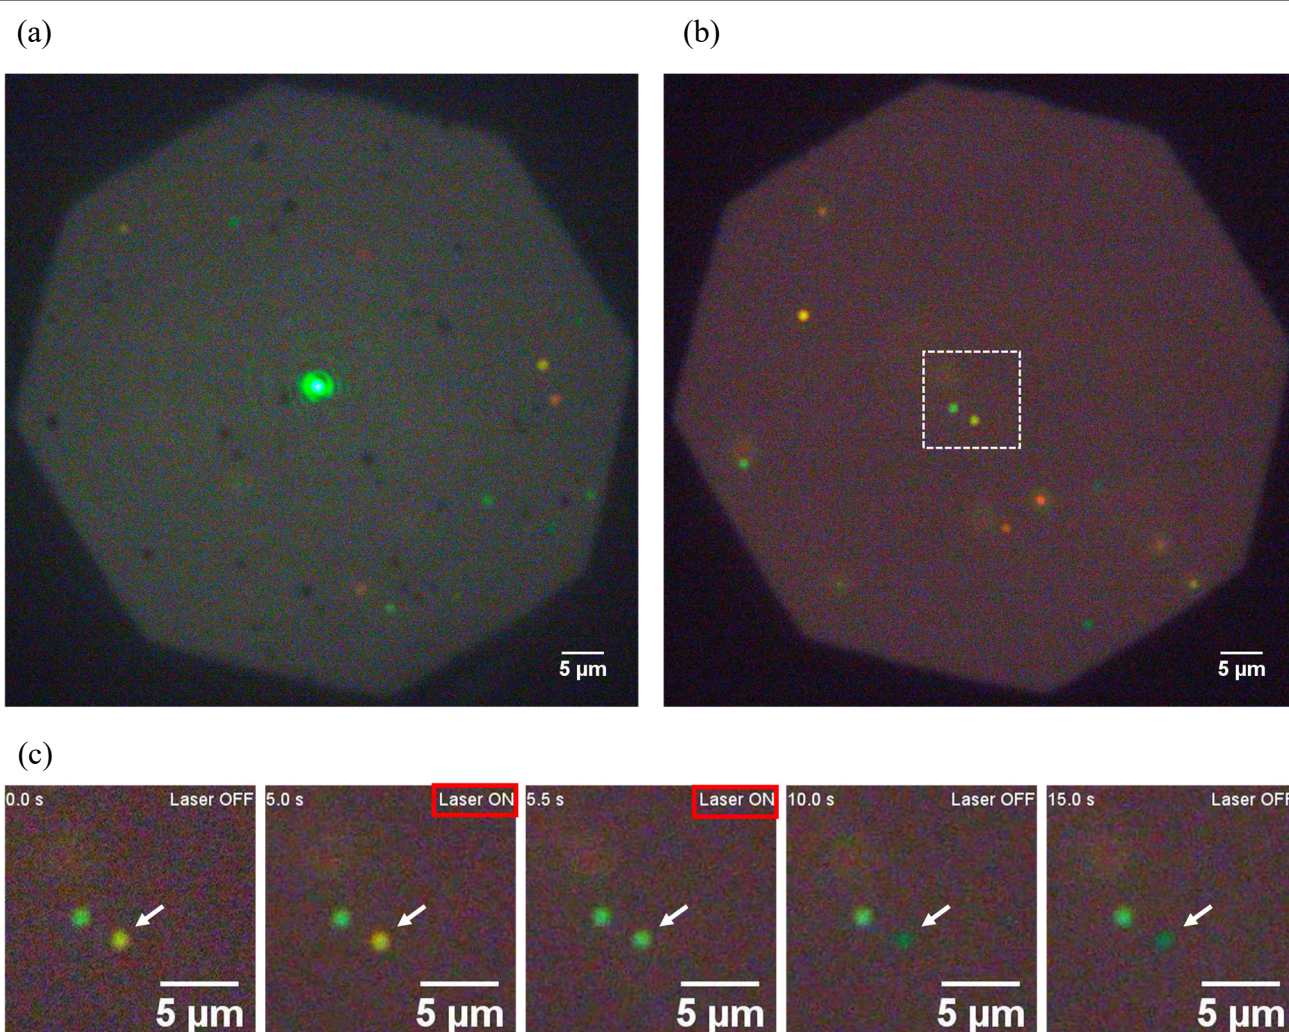

Fig. S3. (a) An image of pulsed-laser ( $\lambda=532$  nm) spot. (b) A pair of neighboring AuNPs in a close distance ( $< 3$  μm) in the spot. The reddish background is due to the use of notch filter to eliminate the green laser light. (c) Snapshots of the responses of the AuNPs to the laser heating., revealing the AuNP in lower right area (which is relatively close to the spot) changed its coloration during laser irradiation, however, another did not show any changes. The AuNP indicated by the arrow, which is a target for the local laser heating, changed its coloration during laser irradiation, while the other AuNP did not show any change. Owing to the low thermal conductivity of water, the heat generated by the AuNP did not affect the neighboring AuNPs, and thus enabled the local coloration tuning. It should be mentioned that the coloration change was not reversible. We suspect that the local heating causes degradation of polymer.

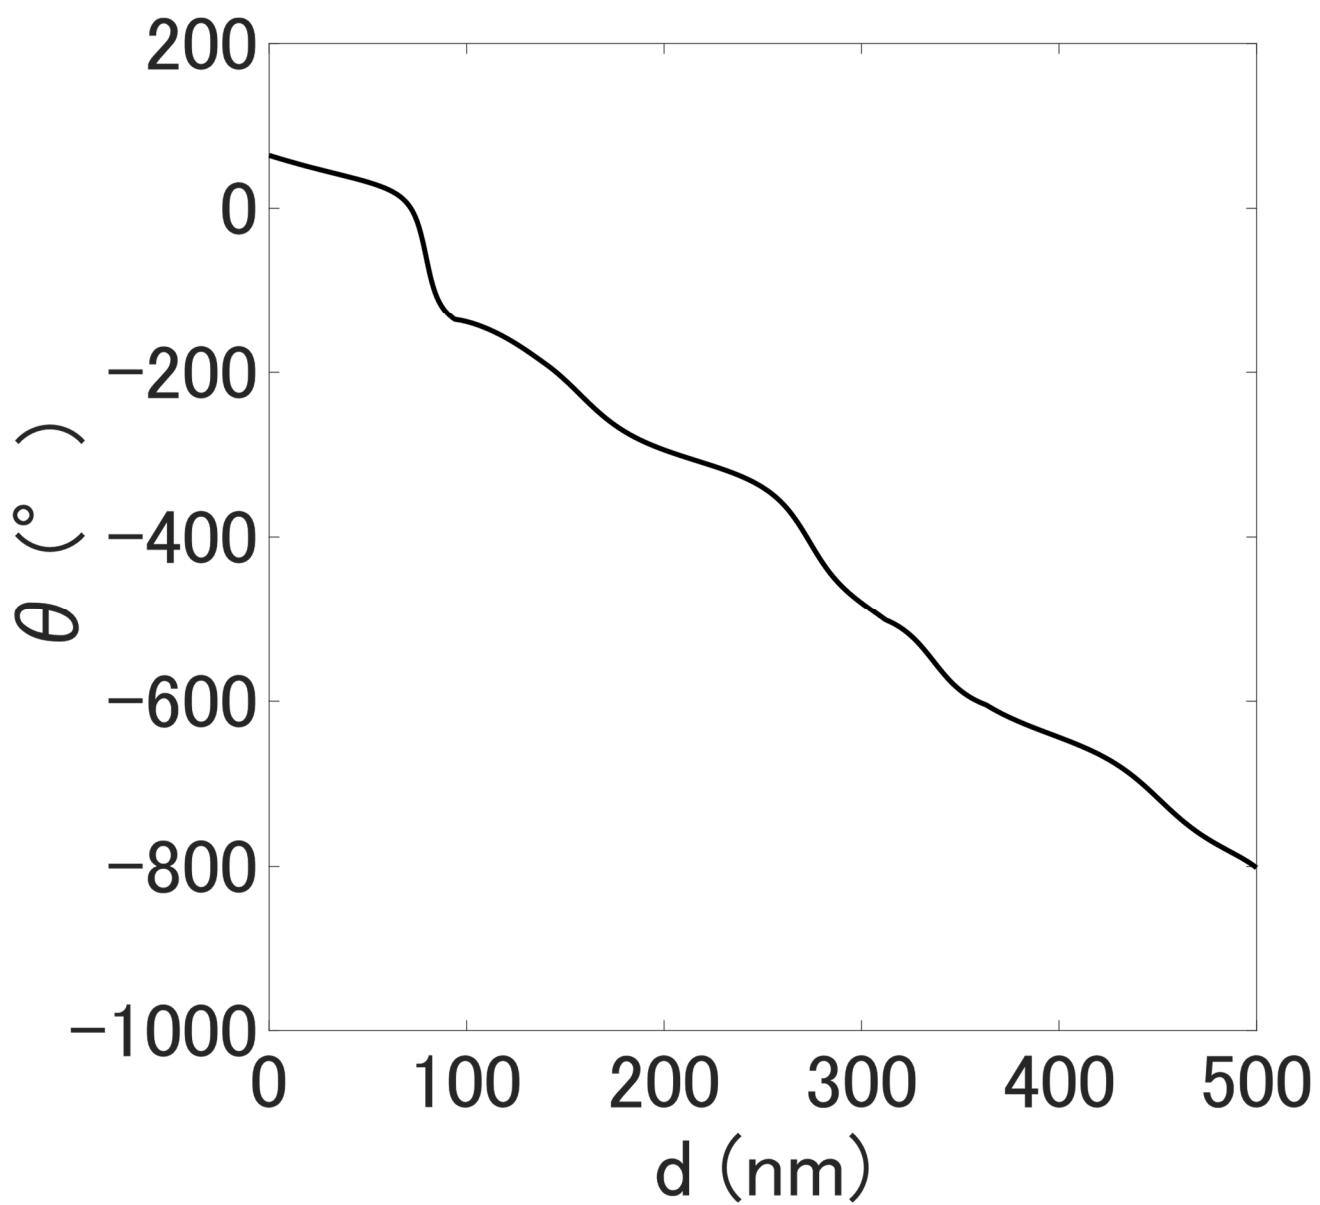

Fig. S4.  $\theta$ - $d$  profile obtained by theoretical calculation changing  $d$  from 0 to 500 nm.

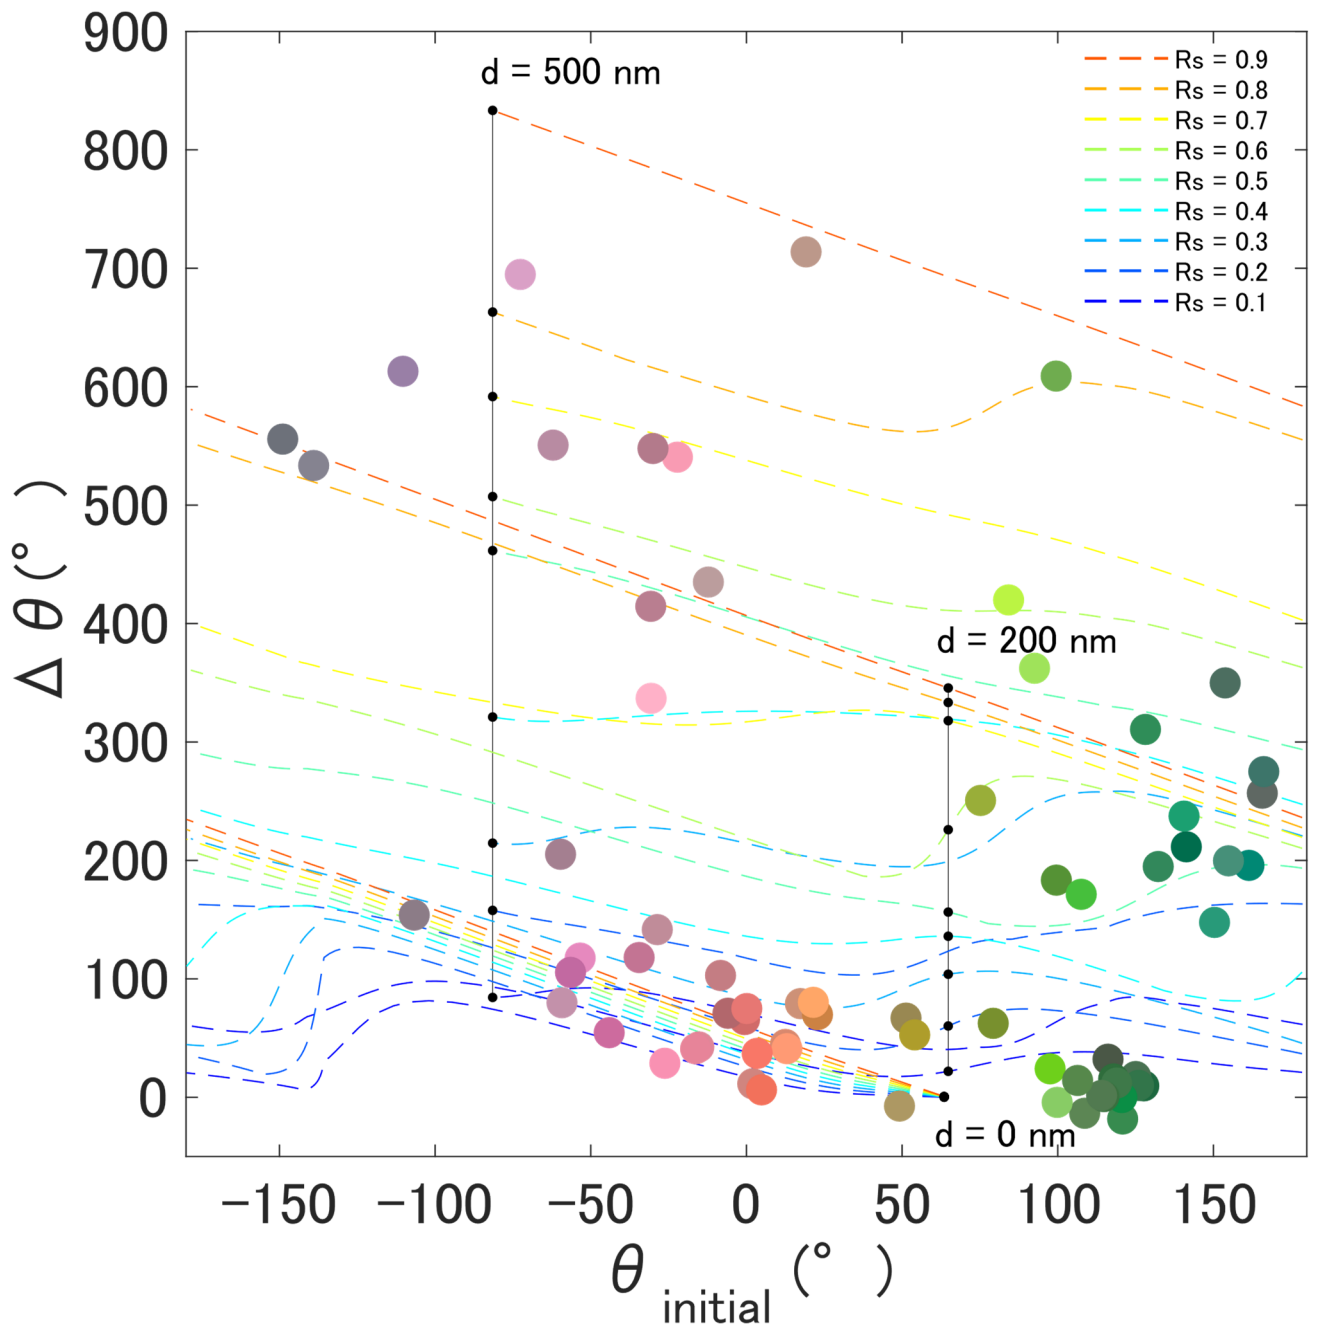

Fig. S5. The relationship between  $\theta_{\text{initial}}$  and  $\Delta\theta$  changing  $d$  from 0 nm to 500 nm, obtained by the theoretical calculation. The dash lines represent theoretical relationship between  $\theta_{\text{initial}}$  and  $\Delta\theta$  obtained by varying  $R_s$  from 0.1 to 0.9. The scattering of experimental results reflects the variation of  $R_s$  from particle to particle.
